# Supplementary material
Source: Royal Society of Chemistry journal article supplement (https://www.rsc.org/suppdata/cc/1999/2227/906817a.doc)
Supplement: Supplementary file 1 [file 906817a.doc]

**Supplementary Data**

**Porphodimethene-porphyrinogen relationship: the generation of unprecendented forms of porphyrinogen**

**Lucia Bonomo,*a* Euro Solari,*a* Rosario Scopelliti,*a* Mario Latronico*b* and Carlo Floriani**a***

*a Institut de Chemie Minérale et Analytique, BCH, Université de Lausanne, CH-1015 Lausanne, Switzerland*

*b Dipartimento di Ingegneria e Fisica dell’Ambiente, Università della Basilicata, 85100 Potenza, Italy*

**Syntheses** **of** **2**, **3**, **5**, **6**, **7** (**Methods** **A** **and** **B**) **and** **8**

*Procedure* *for* **2**. To a solution of **1** (4.08 g, 7.59 mmol) in THF (200 ml) was added, by dropping, a solution of LiNMe2 (0.39 g, 7.59 mmol) in THF (100 ml) at 0 °C. The reaction mixture was warmed to room temperature and stirred for 2 h. The solution was evaporated to dryness. The red solid was collected with *n*-hexane (100 ml) and dried *in* *vacuo* (4.28 g, 82%) (Found: C, 69.93; H, 8.12; N, 7.97. C40H53LiN4NiO2 requires: C, 69.88; H, 7.77; N 8.15%); *δ*H(Pyridine-*d*5, 400 MHz, 298 K) 6.35 (d, *J* = 3.4 Hz, 1H; C4H2N), 6.34 (d, *J* = 2.9 Hz, 1H; C4H2N), 6.32 (d, *J* = 2.9 Hz, 1H; C4H2N), 6.31 (d, *J* = 2.9 Hz, 1H; C4H2N), 6.29 (d, *J* = 3.4 Hz, 1H; C4H2N), 6.27 (d, *J* = 3.4 Hz, 1H; C4H2N), 6.25 (d, *J* = 3.4 Hz, 1H; C4H2N), 6.11 (d, *J* = 2.9 Hz, 1H; C4H2N), 5.34 (q, *J* = 7.3 Hz, 1H; CH), 4.1 (dq, *J*gem = 14.2 Hz, *J*vic = 7.3 Hz, 1H; CH2), 3.9 (dq, *J*gem = 14.2 Hz, *J*vic = 7.3 Hz, 1H; CH2), 3.66 (m, 8H; THF), 3.41 (dq, *J*gem = 14.2 Hz, *J*vic = 7.3 Hz, 1H; CH2), 3.33 (dq, *J*gem = 14.2 Hz, *J*vic = 7.3 Hz, 1H; CH2), 2.5 (m, 4H; CH2), 2.31 (q, *J* = 7.3 Hz, 2H; CH2), 1.75 (d, *J* = 7.3 Hz, 3H; CH3), 1.65 (m, 8H; THF), 1.41 (t, *J* = 7.3 Hz, 6H; CH3), 1.2 (t, *J* = 7.3 Hz, 3H; CH3), 1.1 (t, *J* = 7.3 Hz, 3H; CH3), 1.05 (t, *J* = 7.3 Hz, 3H; CH3). Reprotonation of **2** with 1 equiv. of PyH+Cl in toluene at room temperature gave back **1**.

*Procedure* *for* **3**. LiNMe2 (0.74 g, 14.4 mmol) was added in one portion at room temperature to a stirred solution of **1** (3.84 g, 7.14 mmol) in THF (250 cm3). The reaction was monitored by NMR, and the mixture was stirred until the product **2** was entirely converted (≈ 60 h). The solution was evaporated to dryness. The violet solid was collected with *n*-hexane (100 ml) and dried *in* *vacuo* (4.28 g, 71%) (Found C, 68.54; H, 8.02; N, 6.83. C48H68Li2N4NiO4 requires C, 68.80; H, 8.18; N, 6.69%); *δ*H(Pyridine-*d*5, 400 MHz, 298 K) 6.55 (m, 8H, C4H2N), 6.39 (d, *J* = 3.2 Hz, 2H, C4H2N), 6.38 (d, *J* = 3.2 Hz, 2H, C4H2N), 6.26 (d, *J* = 2.8 Hz, 2H, C4H2N), 6.25 (d, *J* = 2.8 Hz, 2H, C4H2N), 5.87 (q, *J* = 6.85 Hz, 2H, CH), 5.86 (q, *J* = 6.85 Hz, 2H, CH), 4.25–3.75 (m, 8H, CH2), 3.58 (m, 32H, THF), 2.5 (m, 8H, CH2), 2.18 (d, *J* = 6.85 Hz, 6H, CH3 overlapping with d, *J* = 6.85 Hz, 6H, CH3), 1.68 (m, 32H, THF), 1.5 (m, 12H, CH3), 1.19 (t, *J* = 7.6 Hz, 12H, CH3). Crystals suitable for X-ray diffraction were grown in DME and contain six DME molecules in the ion-separated form, the anion being shown in Fig. S1. Reprotonation of **3** with 2 equiv. of PyH+Cl− in toluene at room temperature gave back **1**.

*Procedure* *for* **5**. A solution of LiNMe2 (0.32 g, 6.28 mmol) in THF (50 cm3) was added, by dropping, at room temperature to a solution of **4** (2.0 g, 3.14 mmol) in THF (100 cm3). The reaction mixture was stirred for 2 h, and then was evaporated to dryness. The solid residue was triturated with *n*-hexane to give a light pink powder, which was collected and dried *in* *vacuo* (2.03 g, 73%) (Found: C, 70.62; H, 9.17; N, 9.35. C52H82Li4N6O4 requires C, 70.73; H, 9.36; N, 9.52%); *δ*H(Pyridine-*d*5, 400 MHz, 298 K) 6.46 (d, *J* = 2.4 Hz, 4H, C4H2N), 6.27 (d, *J* = 2.4 Hz, 4H, C4H2N), 3.70 (m, 16H, THF), 3.25 (q, *J* = 7.3 Hz, 4H; CH2), 2.99 (q, *J* = 7.3 Hz, 4H; CH2), 2.17 (q, *J* = 7.3 Hz, 4H; CH2), 1.93 (s, 12H, CH3), 1.62 (m, 16H, THF overlapping with t, *J* = 7.3 Hz, 6H, CH3), 1.05 (t, *J* = 7.3 Hz, 6H, CH3), 0.83 (t, *J* = 7.3 Hz, 6H, CH3).

*Procedure* *for* **6**. LiNMe2 (0.63 g, 12.3 mmol) was added at room temperature to a solution of **4** (3.93 g, 6.15 mmol) in benzene (300 cm3). After 1 h, the 1H NMR spectrum showed that **4** was entirely converted into **5**. The reaction mixture was then refluxed for 12 h and finally was evaporated to dryness. The light yellow solid residue was collected with *n*-pentane (60 cm3) and dried *in* *vacuo* (2.8 g, 70%) (Found C, 74.33; H, 8.13; N, 8.45. C40H52Li4N4O2 requires C, 74.07; H, 8.08; N, 8.64%); *δ*H(Pyridine-*d*5, 400 MHz, 298 K) 6.91 (d, *J* = 2.45 Hz, 2H, C4H2N), 6.86 (d, *J* = 2.45 Hz, 2H, C4H2N), 6.74 (d, *J* = 2.45 Hz, 2H, C4H2N), 6.69 (d, *J* = 2.45 Hz, 2H, C4H2N), 6.47 (d, *J* = 2.45 Hz, 2H, C4H2N overlapping with d, *J* = 2.4 Hz, 2H, C4H2N), 6.36 (d, *J* = 2.45 Hz, 2H, C4H2N overlapping with d, *J* = 2.4 Hz, 2H, C4H2N), 5.95 (q, *J* = 6.85 Hz, 2H, CH), 5.88 (q, *J* = 6.85 Hz, 2H, CH), 3.70 (m, 16H; THF), 2.4–2.2 (m, 16H; CH2), 2.15 (d, *J* = 6.85 Hz, 6H; CH3 overlapping with d, *J* = 6.85 Hz, 6H, CH3), 1.62 (m, 16H, THF), 1.00 (m, 24H, CH3).

*Procedure* *for* **7**

**Method A**: LiNMe2 (0.21 g, 4.12 mmol) was added at room temperature to a solution of **4** (1.31 g, 2.06 mmol) in THF (150 cm3). After 1 h the 1H NMR spectrum showed that **4** was entirely converted into **5**. The reaction mixture was then refluxed for 12 h followed by evaporation to dryness. The solid residue was dissolved in *n*-pentane (100 cm3), and DME was added by dropping until a yellow microcrystalline solid precipitated. The product was then collected and dried *in* *vacuo* (2.0 g, 60%) (Found: C, 60.32; H, 10.13; N, 4.34. C92H163Li4N5O24 requires: C, 60.39; H, 10.07; N, 4.29%); *δ*H(Pyridine-*d*5, 400 MHz, 298 K) 6.54 (d, *J* = 2.9 Hz, 1H, C4H2N), 6.52 (d, *J* = 2.9 Hz, 1H, C4H2N), 6.45 (m, 3H, C4H2N), 6.42 (d, *J* = 2.9 Hz, 1H, C4H2N), 6.39 (d, *J* = 2.9 Hz, 1H, C4H2N), 6.30 (d, *J* = 2.9 Hz, 1H, C4H2N), 5.41 (q, *J* = 7.3 Hz, 1H, CH), 3.49 (s, 48H, DME), 3.26 (s, 72H, DME), 2.9–2.68 (m, 2H, CH2), 2.62 (m, 1H, CH2), 2.57–2.33 (m, 4H, CH2), 2.30 (m, 1H, CH2), 2.26 (q, *J* = 7.3 Hz, 2H, CH2), 2.02 (s, 3H, CH3), 1.99 (s, 3H, CH3), 1.75 (d, *J* = 7.3 Hz, 3H, CH3), 1.33 (t, *J* = 7.3 Hz, 3H, CH3 overlapping with t, *J* = 7.3 Hz, 3H, CH3), 1.19 (t, *J* = 7.3 Hz, 3H, CH3), 0.77 (t, *J* = 7.3 Hz, 3H, CH3 overlapping with t, *J* = 7.3 Hz, 3H, CH3). Crystals suitable for X-ray diffraction were obtained in a mixture of DME–*n*-heptane and contain only three molecules of DME in the ion-pair form shown in Fig. S2.

**Method B**: LiNMe2 (0.10 g, 1.96 mmol) was added at room temperature to a solution of **8** (1.68 g, 1.96 mmol) in DME (100 ml). After 1 h stirring 1H NMR showed that **8** was entirely converted into **7**. The reaction mixture was concentrated, and *n*-pentane (100 ml) was added to give **7**, which was collected and dried *in* *vacuo* (1.82 g, 57%).

*Procedure* *for* **8**. LiNMe2 (0.4 g, 7.84 mmol) was added at room temperature to a solution of **4** (2.50 g, 3.92 mmol) in DME (300 ml). After 1 h 1H NMR showed that **4** was entirely converted into **5**. The reaction mixture was then refluxed for 12 h. A white crystalline solid precipitated and *n*-pentane (200 ml) was added to completely eliminate the excess of LiNMe2, which was filtered off. The solution was then cooled to −20 °C for 12 h and a red crystalline solid precipitated. The product was then collected and dried *in* *vacuo* (1.75 g, 52%). Crystals suitable for X-ray diffraction were obtained in a mixture of DME–*n*-pentane (Found: C, 67.28; H, 9.15; N, 6.74. C48H77Li3N4O8 requires: C, 67.12; H. 9.03; N, 6.52%); *δ*H(Pyridine-*d*5, 400 MHz, 298 K) 7.25 (d, *J* = 3.2 Hz, 1H; C4H2N), 7.22 (d, *J* = 4.0 Hz, 1H; C4H2N), 6.89 (d, *J* = 2.8 Hz, 1H; C4H2N), 6.77 (d, *J* = 2.8 Hz, 1H; C4H2N), 6.66 (d, *J* = 4.0 Hz, 1H; C4H2N), 6.63 (d, *J* = 4.0 Hz, 1H; C4H2N), 6.61 (d, *J* = 4.0 Hz, 1H; C4H2N), 6.51 (d, *J* = 3.2 Hz, 1H; C4H2N), 5.65 (q, *J* = 6.85 Hz, 1H; CH), 3.49 (s, 16H; DME), 3.28 (s, 24H; DME), 2.83 (q, *J* = 7.6 Hz, 2H; CH2), 2.50 (m, 4H; CH2), 2.25 (m, 4H; CH2), 1.95 (d, *J* = 6.85 Hz, 3H; CH3), 1.23 (t, *J* = 7.6 Hz, 3H; CH3), 0.85 (t, *J* = 7.3 Hz, 12H; CH3).


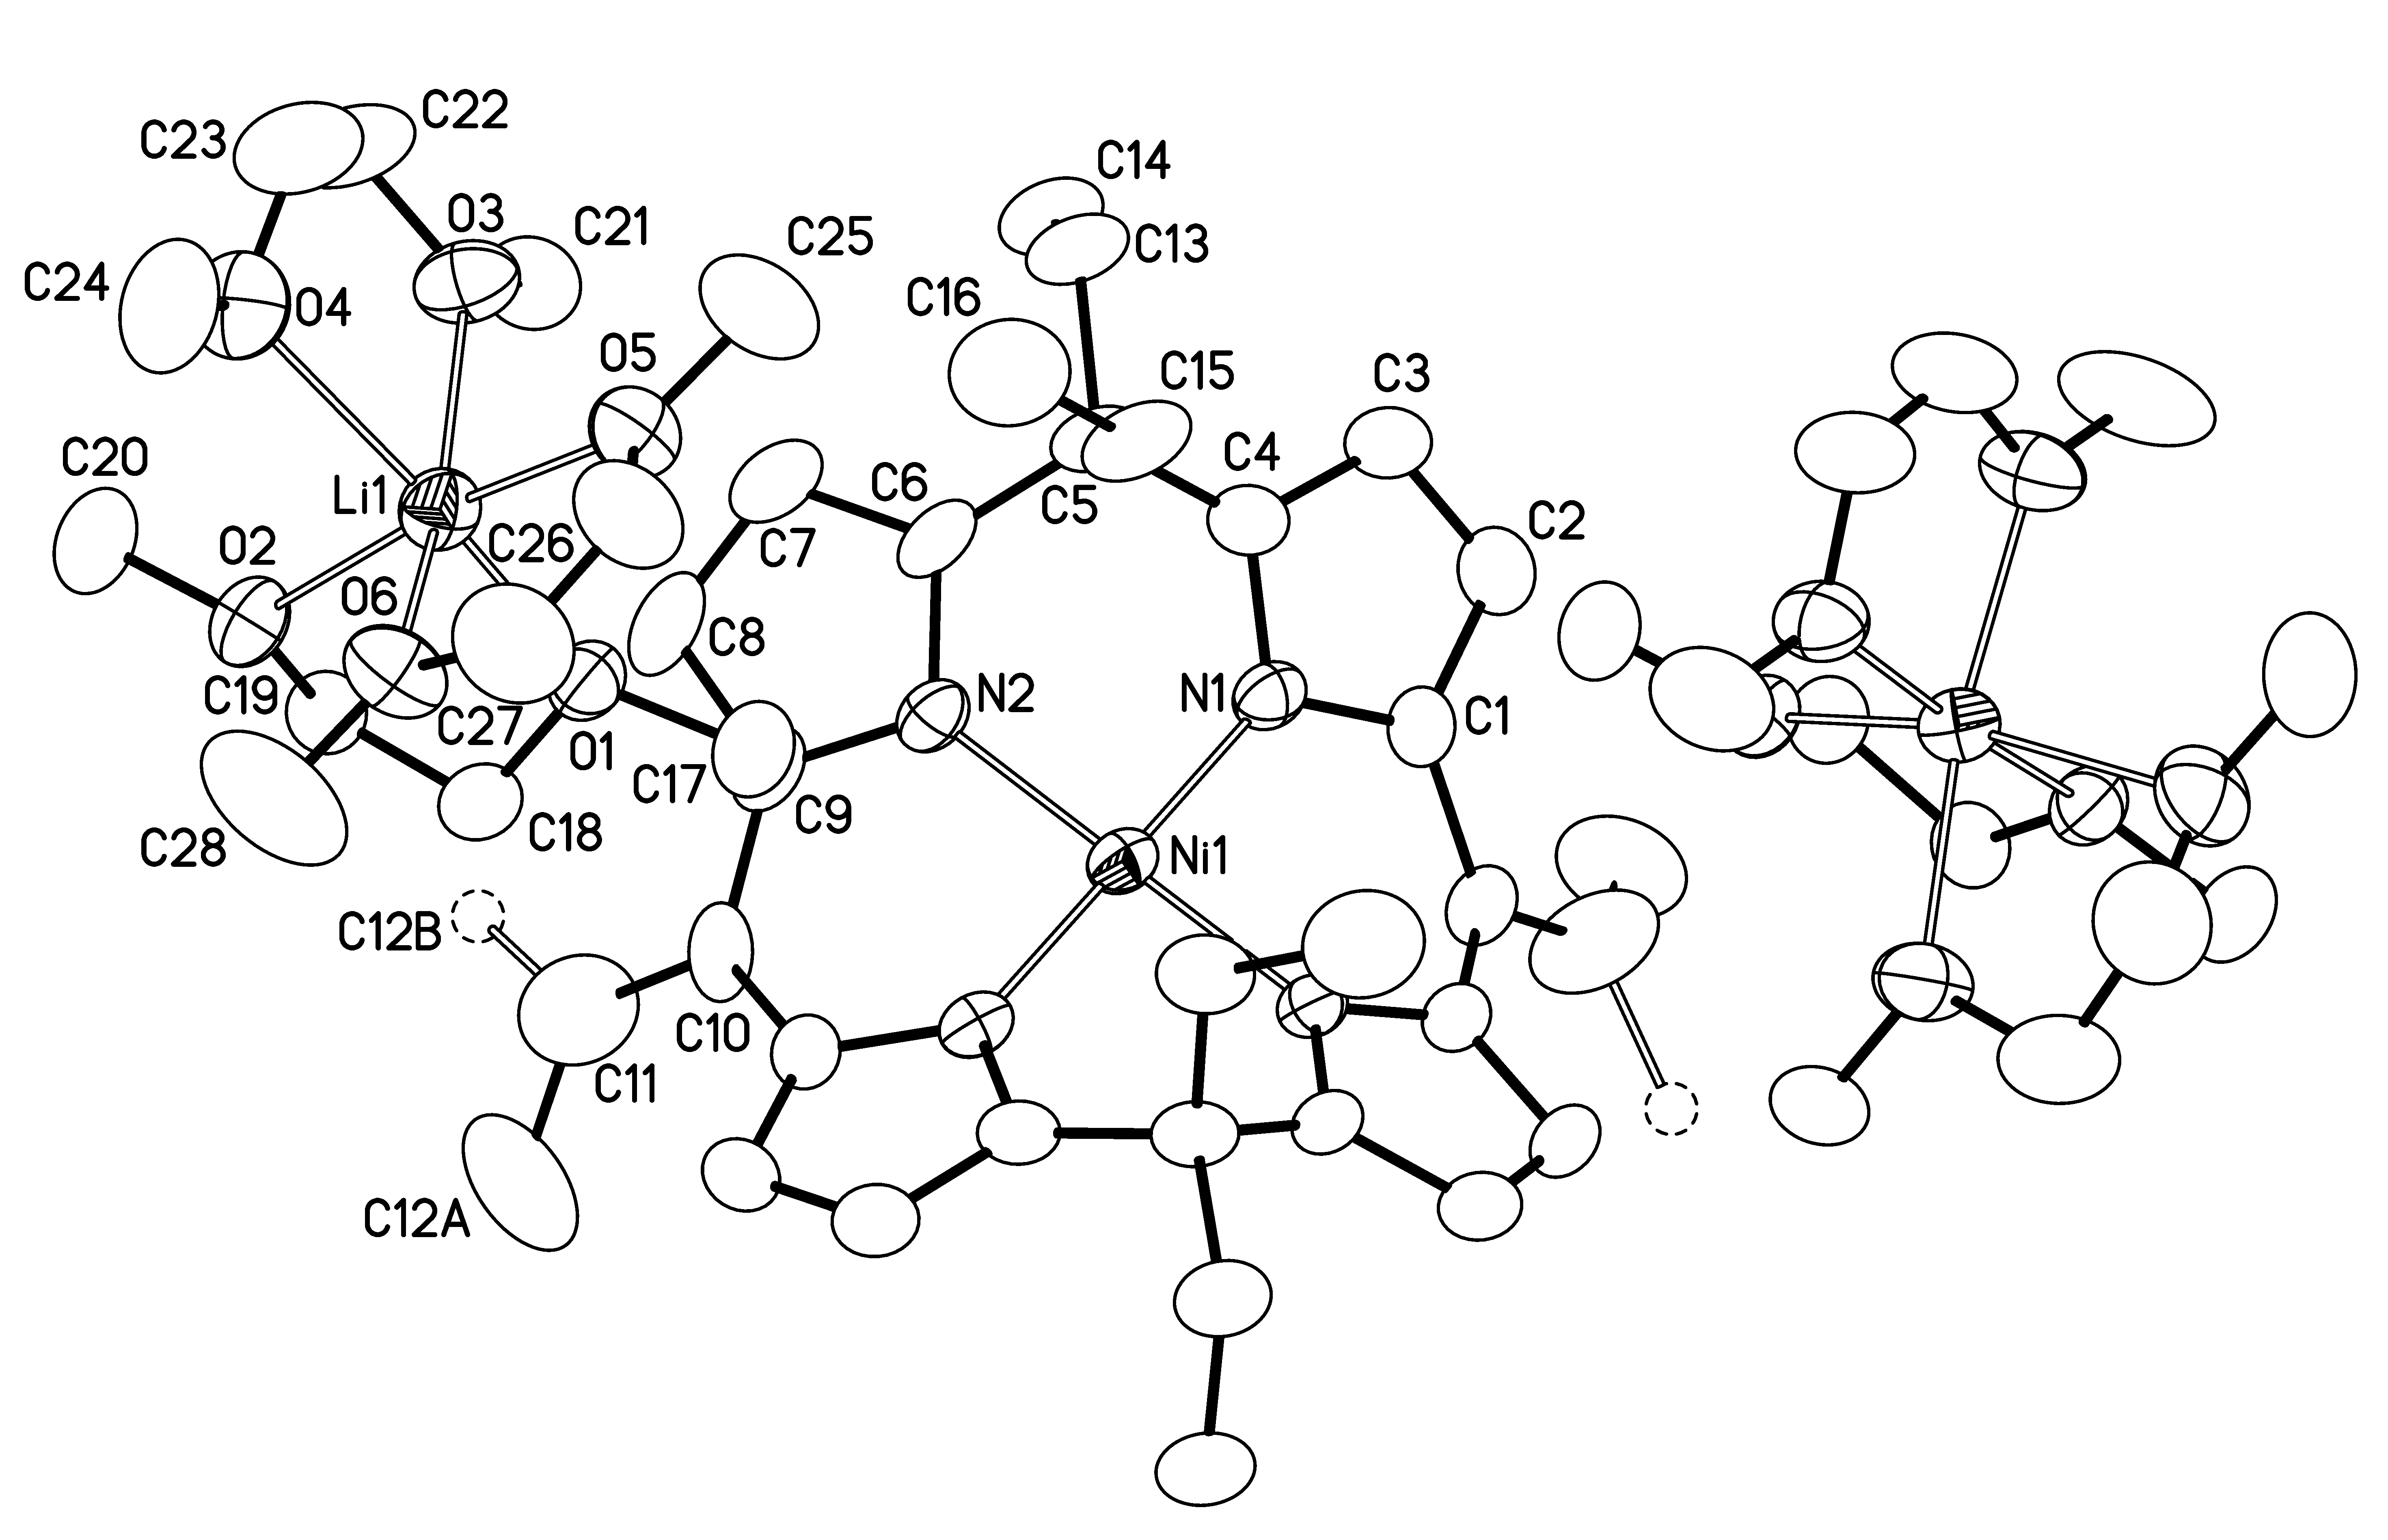


**Fig. S1** An ORTEP drawing of complex **3** (25% probability ellipsoids).


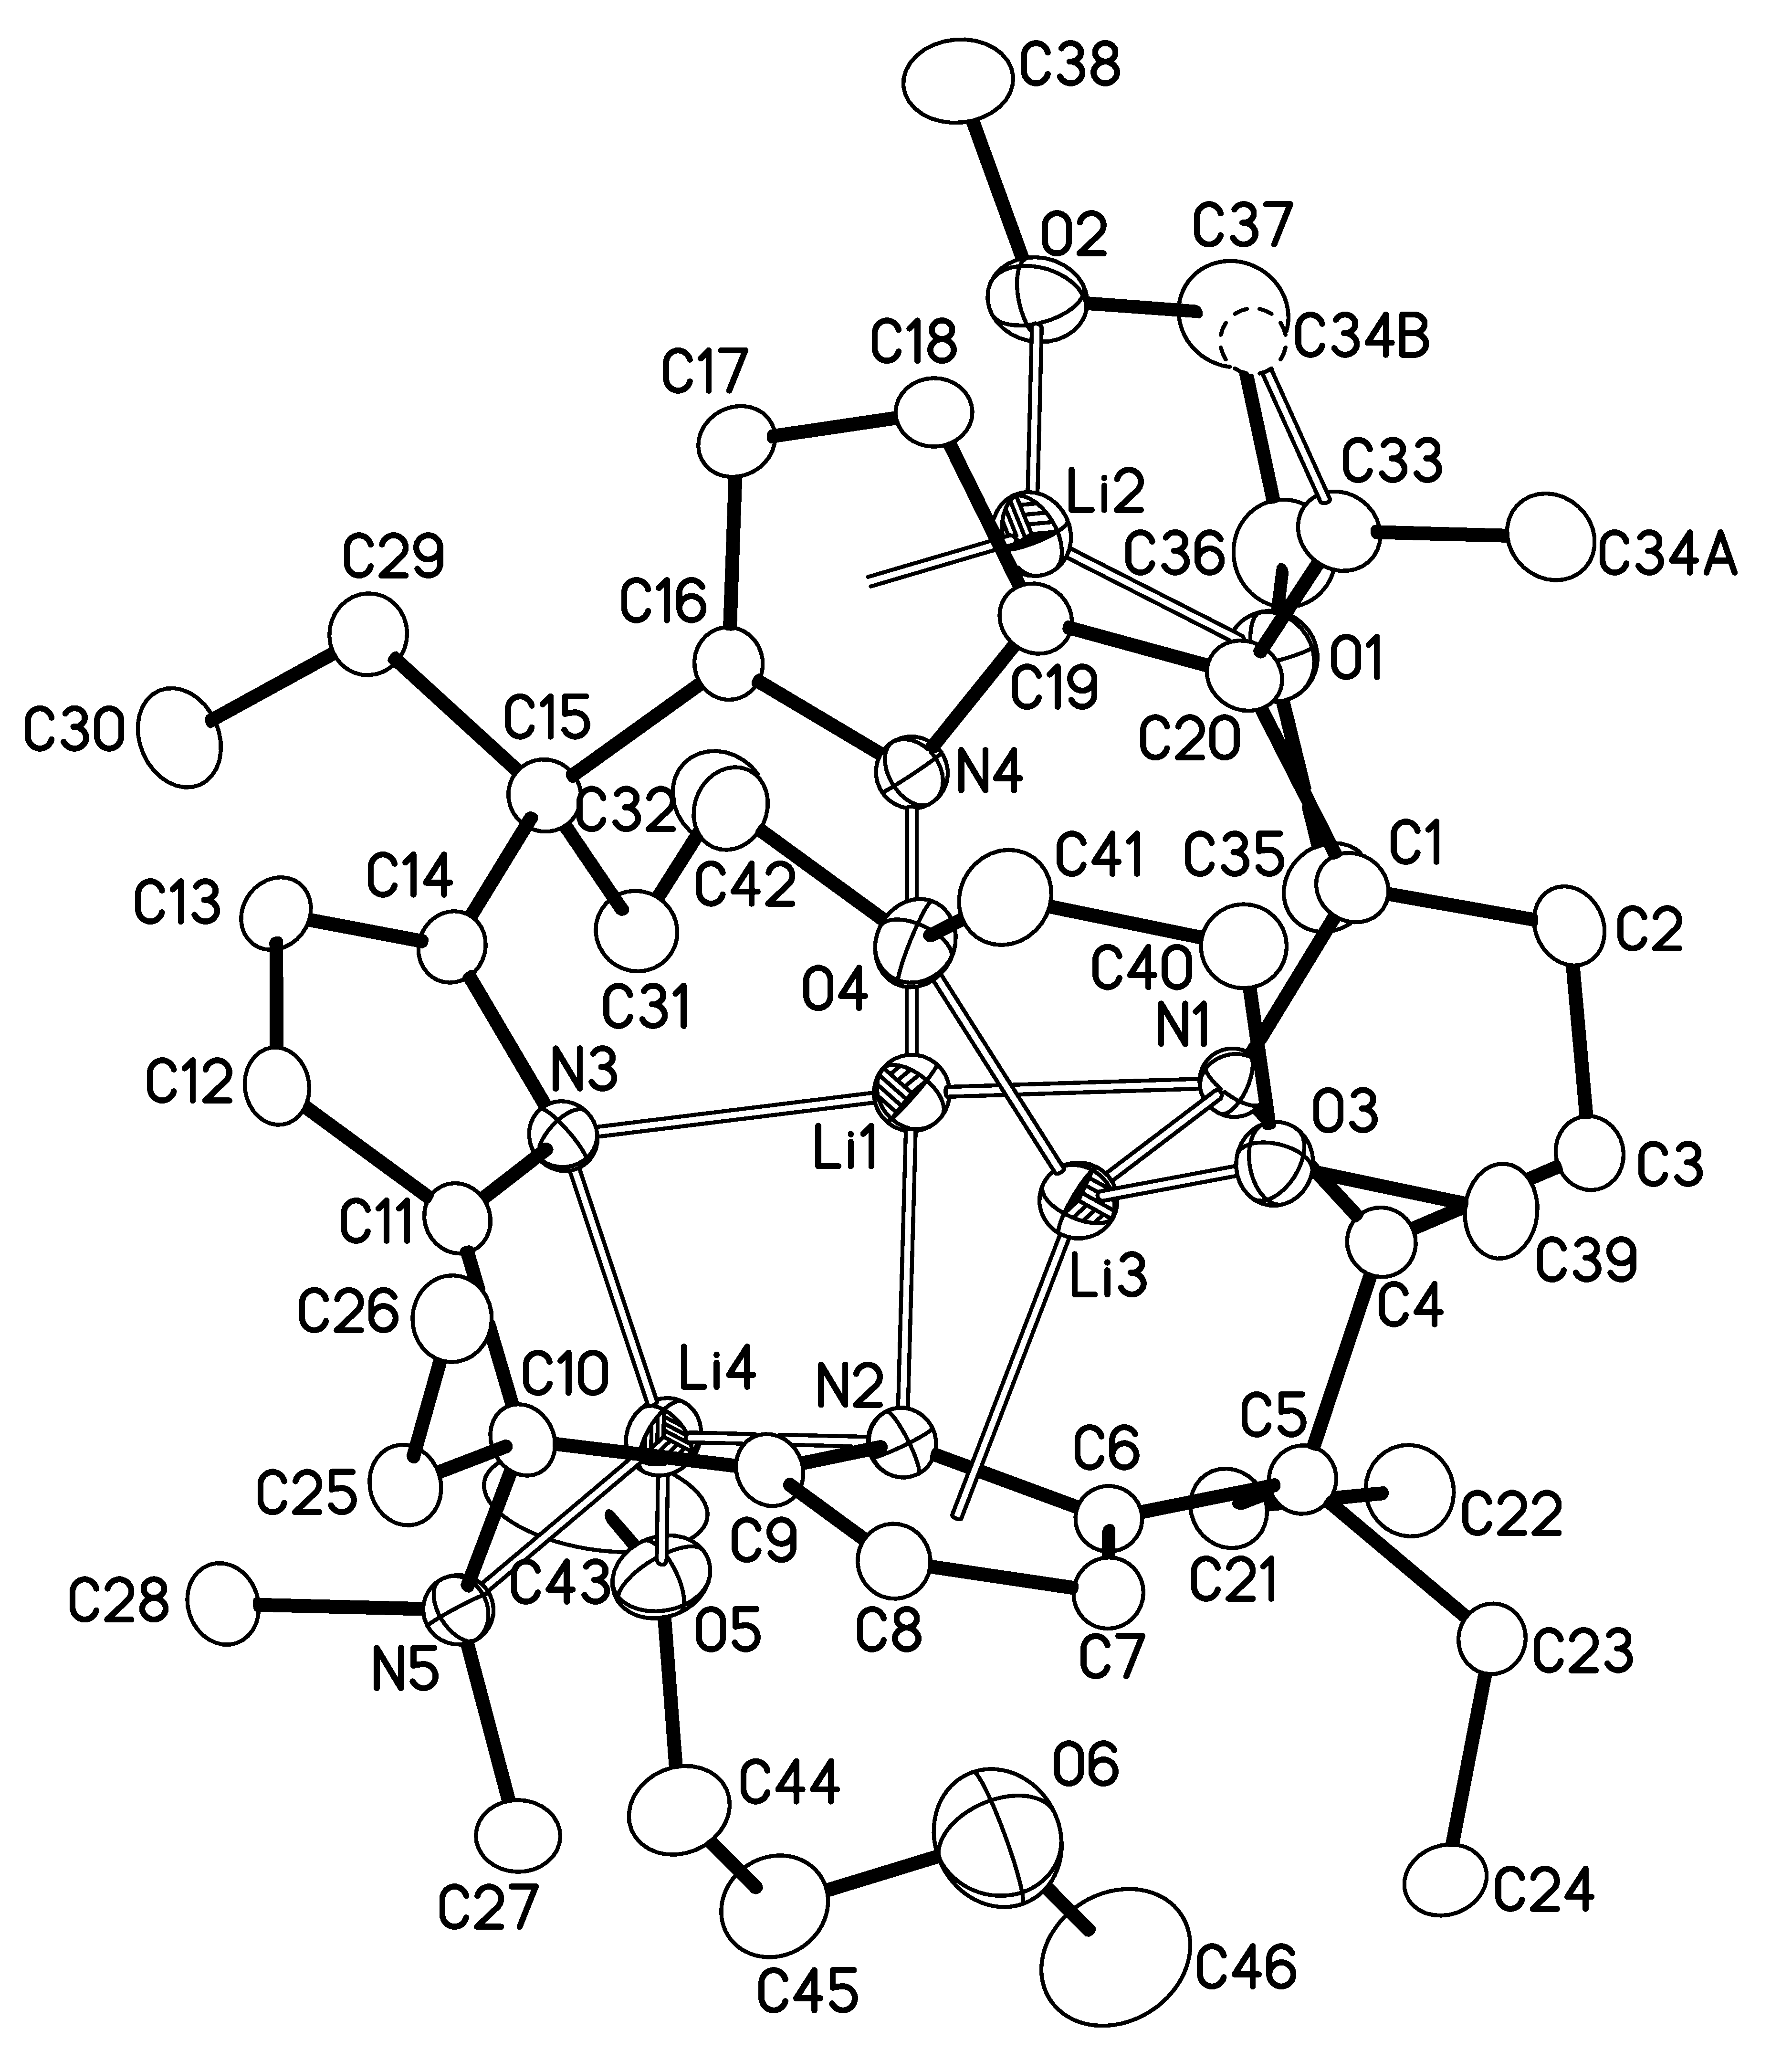


**Fig. S2** An ORTEP drawing of complex **7** (25% probability ellipsoids).
